# Supplementary material for: Functional characterization of chitin-binding lectin from Solanum integrifolium containing anti-fungal and insecticidal activities
Source: Springer Nature journal article supplement (doi:10.1186/s12870-017-1222-0), 2018-01-03
Supplement: MOESM1 [file 12870_2017_1222_MOESM1_ESM.pdf]

**Supplement Table I** Tryptic digested peptide sequences identified by MS

| mass      | position | peptide sequence                   |
|-----------|----------|------------------------------------|
| 2891.4977 | 139-168  | SPPPPSPPPPSPSPPPPSPP<br>PPSPSPPPPK |
| 2268.0561 | 111-133  | DGGGCQSKPGAQSLEGY<br>GTS LQK       |
| 1777.9112 | 53-69    | TIQGQSATTALTMEVAR                  |
| 1283.6156 | 44-52    | IFOLIUMMK                          |
| 1236.6809 | 169-178  | IHFMFISTIK                         |
| 1230.5538 | 74-83    | HFFDYGSTTR                         |
| 1176.5625 | 199-206  | FFFWPNYR                           |
| 1114.4656 | 180-191  | CGLGSEFCGGGK                       |
| 1036.4793 | 99-107   | EISESNETK                          |
| 723.2912  | 90-98    | CGMGGGGGK                          |
| 616.3664  | 192-196  | NELIK                              |
| 575.3035  | 134-138  | EIEGK                              |
| 507.2344  | 84-87    | NSMR                               |

## Supplement Table II Primer sequences used in this study

| Primers                                | Sequence                        |
|----------------------------------------|---------------------------------|
| Degenerated primers for PCR cloning    |                                 |
| 5-F1                                   | atg aar can ath car ggn car wsn |
| 5-F2                                   | gcn can can gcn ytn can atg gar |
| 5-F3                                   | gtn gcn mgn gtn car gcn trr     |
| 3-R1                                   | aar aay gar ytn ath aar         |
| 3-R2                                   | tty aar tty tty tty tgg         |
| 3-R3                                   | ccn aay tay mgn ytn             |
| Sequence primers used for cDNA cloning |                                 |
| 5-F4                                   | atg aaa acc atc caa ggc         |
| 3-R4                                   | aag tcg ata att ggg cca         |

**Supplement Table III** The activity of CBL  
in various metal ions

| <b>Metal ions</b> | <b>Residual activity (%)</b> |
|-------------------|------------------------------|
| CaCl <sub>2</sub> | 116±7                        |
| CuCl <sub>2</sub> | 72±2                         |
| FeCl <sub>3</sub> | 101±5.5                      |
| MgCl <sub>2</sub> | 95±2.5                       |
| MnCl <sub>2</sub> | 96±1.2                       |
| ZnCl <sub>2</sub> | 98±0.6                       |
| EDTA              | 85±2.6                       |

**Supplement Table IV** *In vitro* inhibition effect of CBL on fungus

| <b>Organism</b>           | <b>Diameter of zone of inhibition (mm)</b> |                                     |                                |
|---------------------------|--------------------------------------------|-------------------------------------|--------------------------------|
|                           | Crude extract<br>(0.5 mg/mL)               | Purified natural<br>CBL (0.5 mg/mL) | Recombinant<br>CBL (0.5 mg/mL) |
| <i>C. gloeosporioides</i> | 0                                          | 2                                   | 8                              |
| <i>R. solani</i>          | 6                                          | 10                                  | 12                             |

The boiled CBL was used as negative control.
