# Supplementary material for: Functional characterization of chitin-binding lectin from Solanum integrifolium containing anti-fungal and insecticidal activities
Source: Springer Nature journal article supplement (doi:10.1186/s12870-017-1222-0), 2018-01-03

**Supplement Figure 2** The effect of temperature on CBL

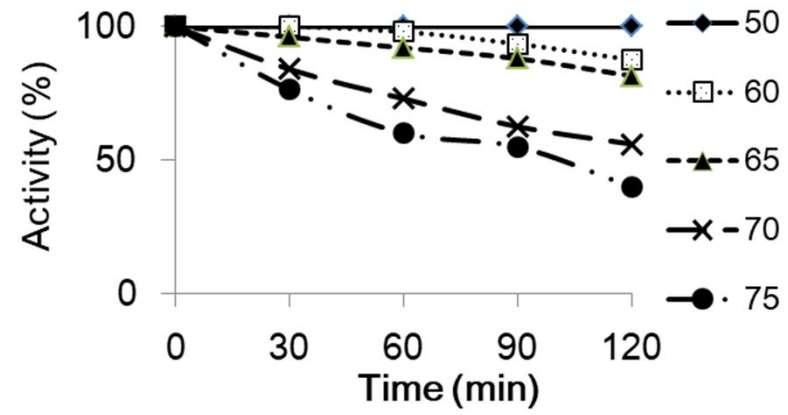

**Supplement Figure 3** The effect of pH on CBL

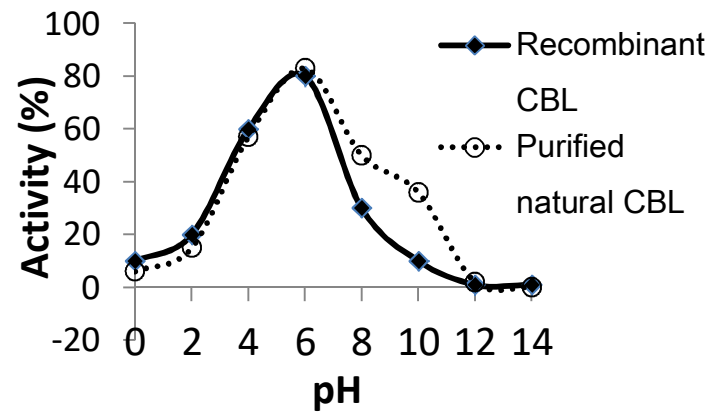

Supplement: MOESM2 [file 12870_2017_1222_MOESM2_ESM.pdf]
